# Supplementary material for: Tunable electromagnetic shielding properties of conductive poly(vinylidene fluoride)/Ni chain composite films with negative permittivity
Source: Royal Society of Chemistry journal article supplement (doi:10.1039/c7tc01865g), 2017-01-01
Supplement: c7tc01865g1.pdf [file c7tc01865g1.pdf]

## Supporting Information

### **Tunable electromagnetic shielding properties of conductive poly(vinylidene fluoride)/Ni chains composite films with negative permittivity**

Biao Zhao, Chul B. Park\*

Microcellular Plastics Manufacturing Laboratory, Department of Mechanical and Industrial Engineering, University of Toronto, 5 King's College Road, Toronto M5S 3G8, Canada

\* Corresponding Author: Chul B. Park, [park@mie.utoronto.ca](mailto:park@mie.utoronto.ca), Tel: +1- 416-978-3053, Fax: +1- 416-978-0947.

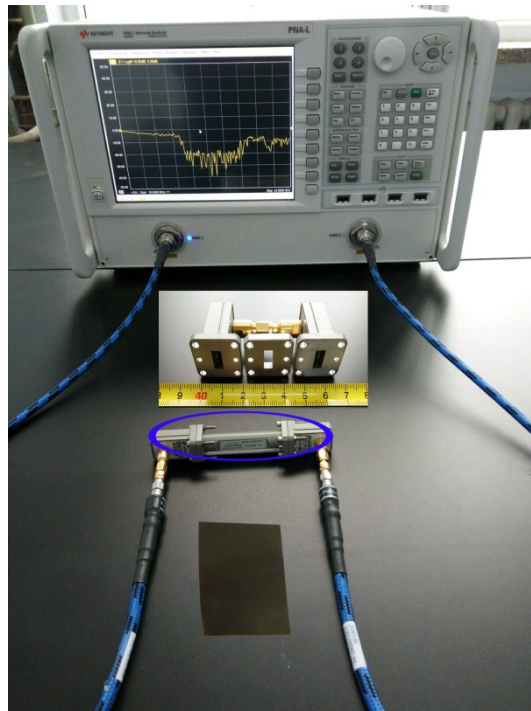

**Fig. S1** The experiment instrument for EMI shielding measurement

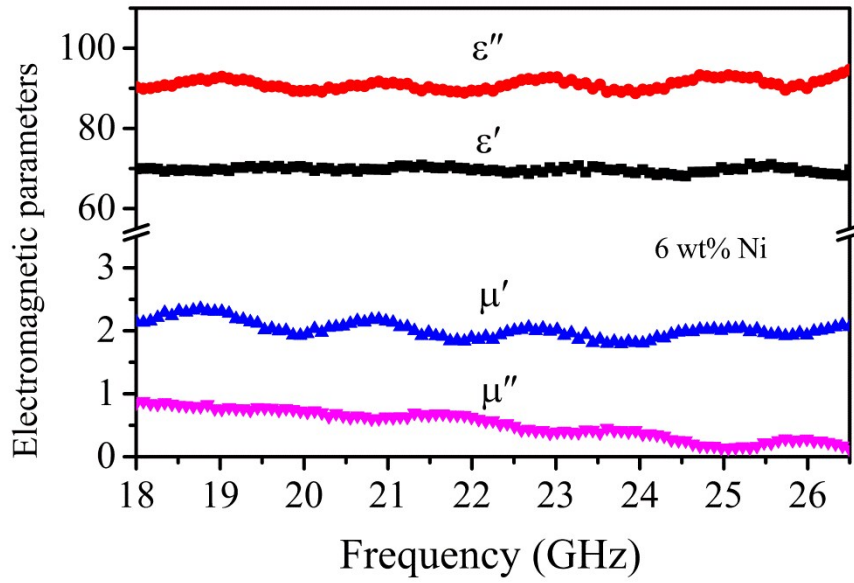

**Fig. S2** The complex permittivity ( $\mu_r = \mu' - j\mu''$ ) and permittivity ( $\epsilon_r = \epsilon' - j\epsilon''$ ) of PVDF/6 wt%-Ni composite
